# Supplementary figures and images for: B4GAT1 is the priming enzyme for the LARGE-dependent functional glycosylation of α-dystroglycan
Source: eLife journal article supplement (doi:10.7554/elife.03943), 2014-10-03

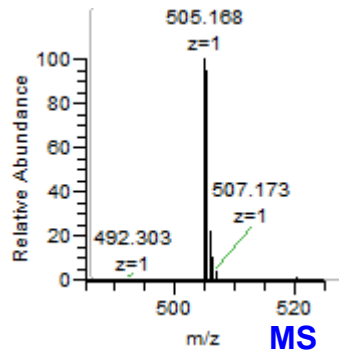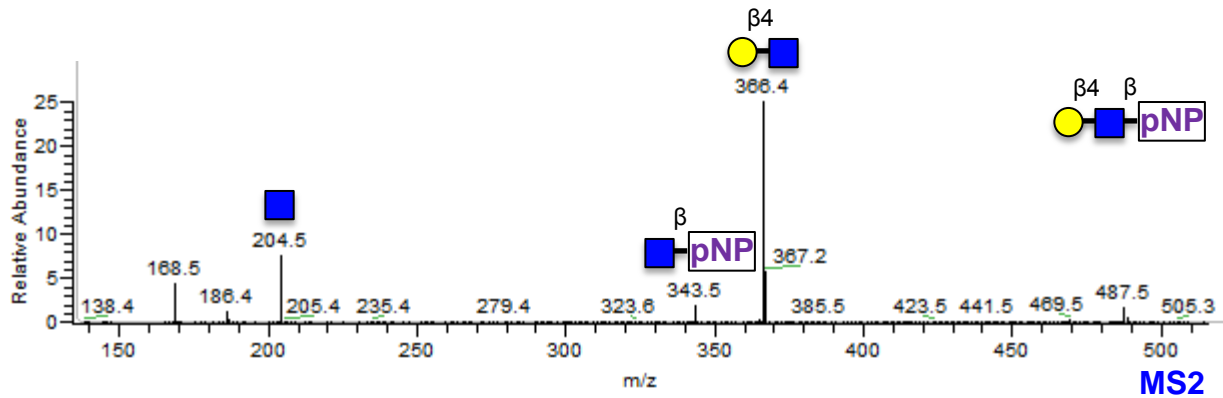

Supplement: supp [file elife_poa_e03943_Figure1_figure_supplement_2.pdf › elife_poa_e03943_Figure1_figure_supplement_2.pdf]

## B3GNT1

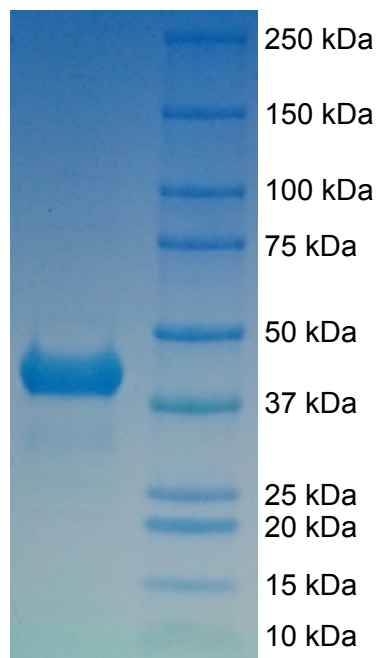

## B3GNT2

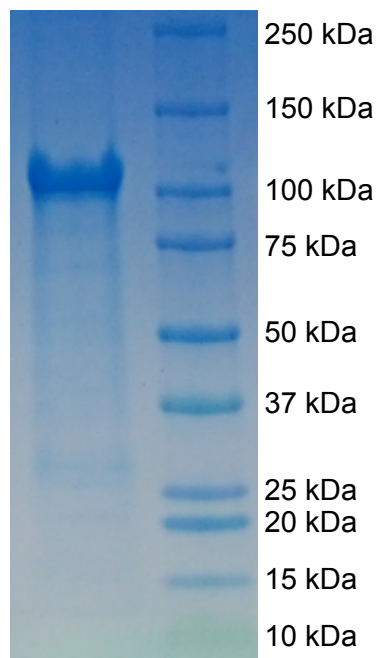

## LARGE

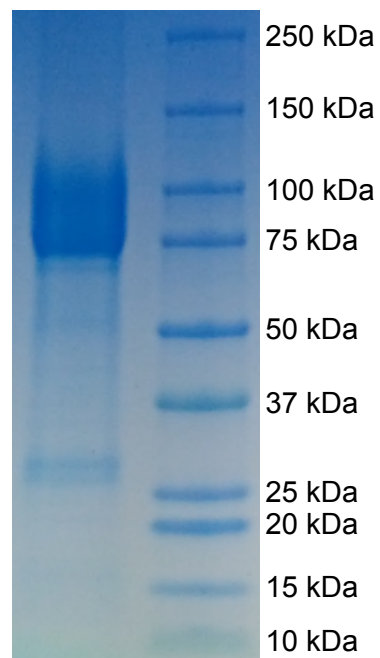

Supplement: supp [file elife_poa_e03943_Figure_1_figure_supplement_1.pdf › elife_poa_e03943_Figure_1_figure_supplement_1.pdf]

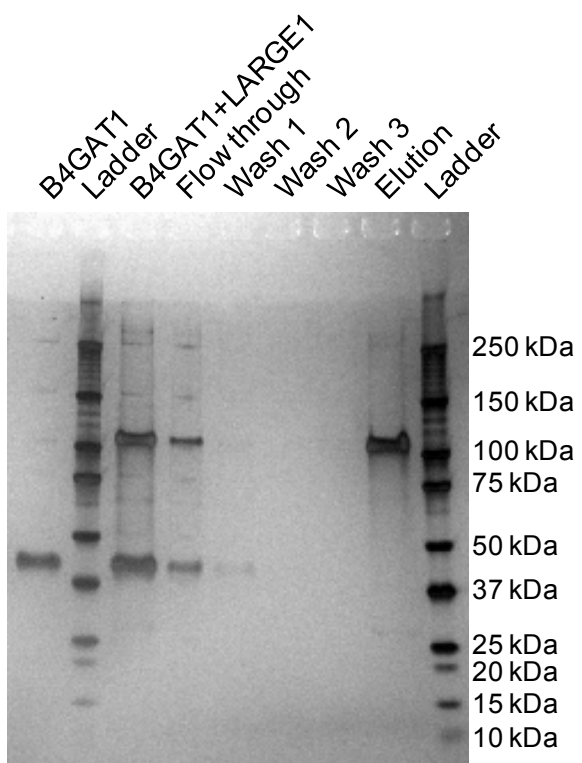

Supplement: supp [file elife_poa_e03943_Figure_2_figure_supplement_1.pdf › elife_poa_e03943_Figure_2_figure_supplement_1.pdf]

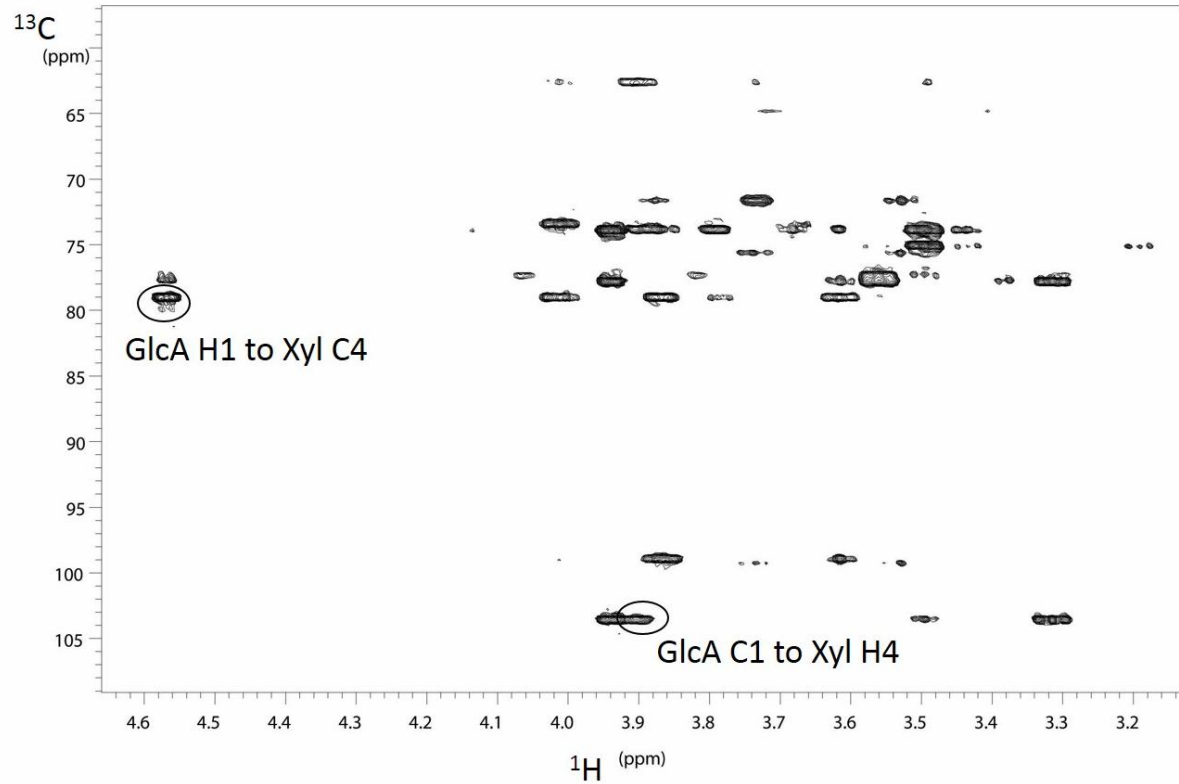

Supplement: supp [file elife_poa_e03943_Figure_3_figure_supplement_1.pdf › elife_poa_e03943_Figure_3_figure_supplement_1.pdf]

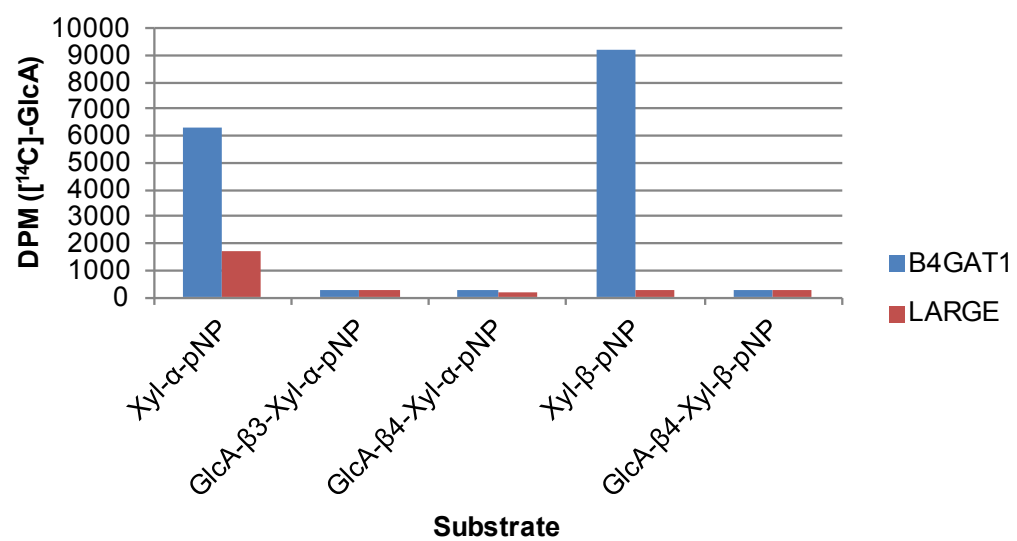

Supplement: supp [file elife_poa_e03943_Figure_5_figure_supplement_1.pdf › elife_poa_e03943_Figure_5_figure_supplement_1.pdf]

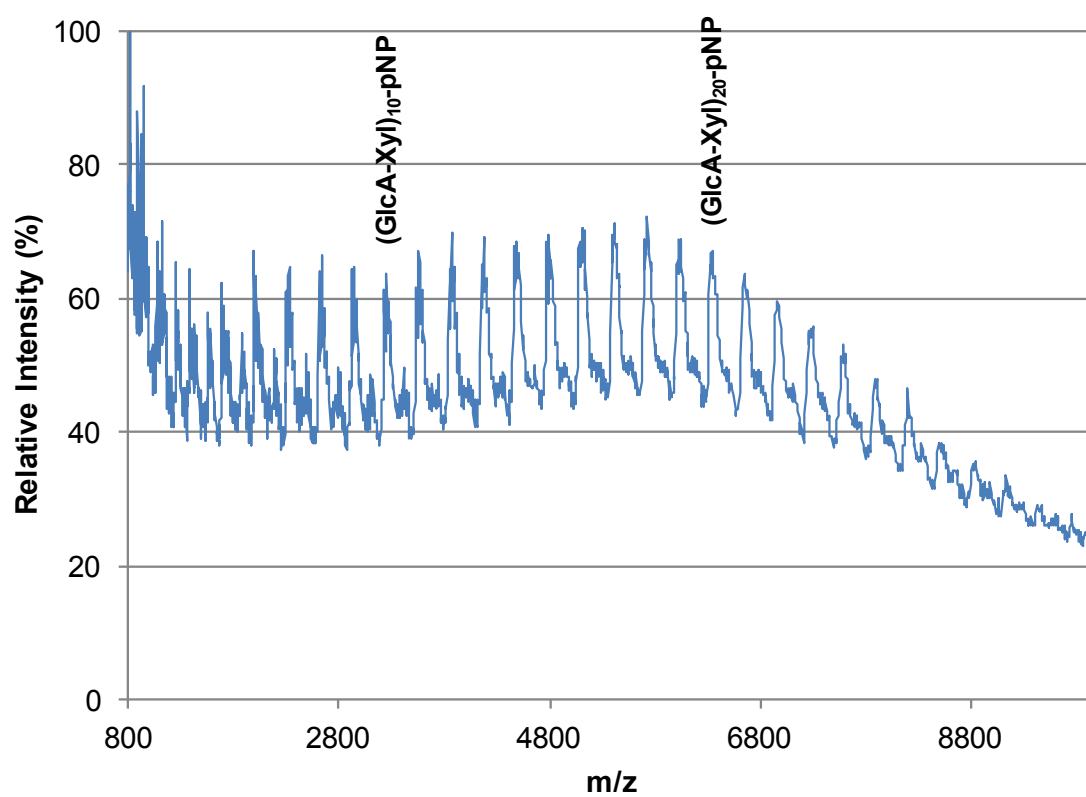

Supplement: supp [file elife_poa_e03943_Figure_6_figure_supplement_1.pdf › elife_poa_e03943_Figure_6_figure_supplement_1.pdf]
